# Supplementary material for: Effectiveness of Sensor-Augmented Insulin-Pump Therapy in Type 1 Diabetes
Source: Atypon-hosted journal article supplement (doi:10.1056/nejmoa1002853), 2010-06-29

## Supplementary Appendix

This appendix has been provided by the authors to give readers additional information about their work.

Supplement to: Bergenstal RM, Tamborlane WV, Ahmann A, et al. Effectiveness of sensor-augmented insulin-pump therapy in type 1 diabetes. *N Engl J Med* 2010;363:311-20. DOI: 10.1056/NEJMoa1002853.

Supplemental Table 1. Treatment Differences in Glycated Hemoglobin Between Study Groups After 1 Year\*

|                    | Last observation carried forward |         | Observed cases                   |         | Multiple imputation sensitivity analysis |         |
|--------------------|----------------------------------|---------|----------------------------------|---------|------------------------------------------|---------|
|                    | Treatment difference, % (95% CI) | P-value | Treatment difference, % (95% CI) | P-value | Treatment difference, % (95% CI)         | P-value |
| All patients       | -0.6 (-0.73, -0.45)              | <0.001  | -0.6 (-0.71, -0.44)              | <0.001  | -0.5 (-0.68, -0.40)                      | <0.001  |
| Adult patients     | -0.6 (-0.77, -0.45)              | <0.001  | -0.6 (-0.76, -0.45)              | <0.001  | -0.6% (-0.72, -0.41)                     | <0.001  |
| Pediatric patients | -0.5 (-0.77, -0.20)              | <0.001  | -0.5 (-0.80, -0.22)              | <0.001  | -0.5% (-0.75, -0.17)                     | 0.002   |

\*All treatment differences were in favor of sensor-augmented pump therapy.

Supplemental Fig.1. Example of a Sensor-Augmented Pump System

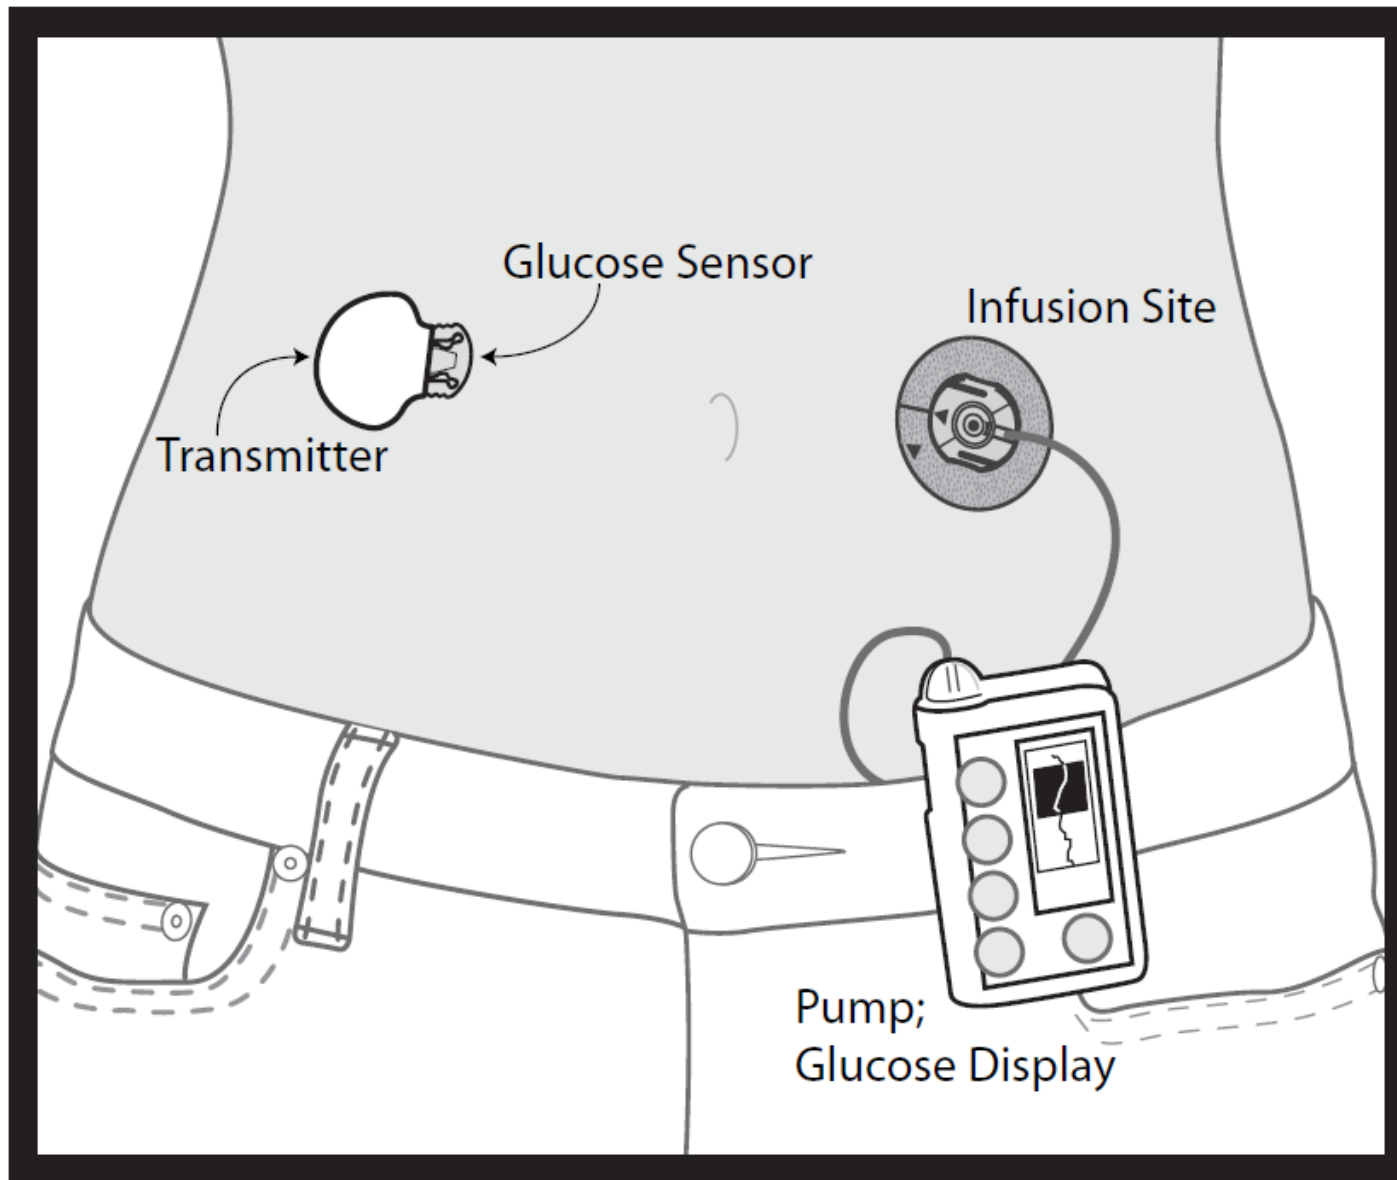

Supplemental Fig. 2. CONSORT Diagram of Patient Disposition

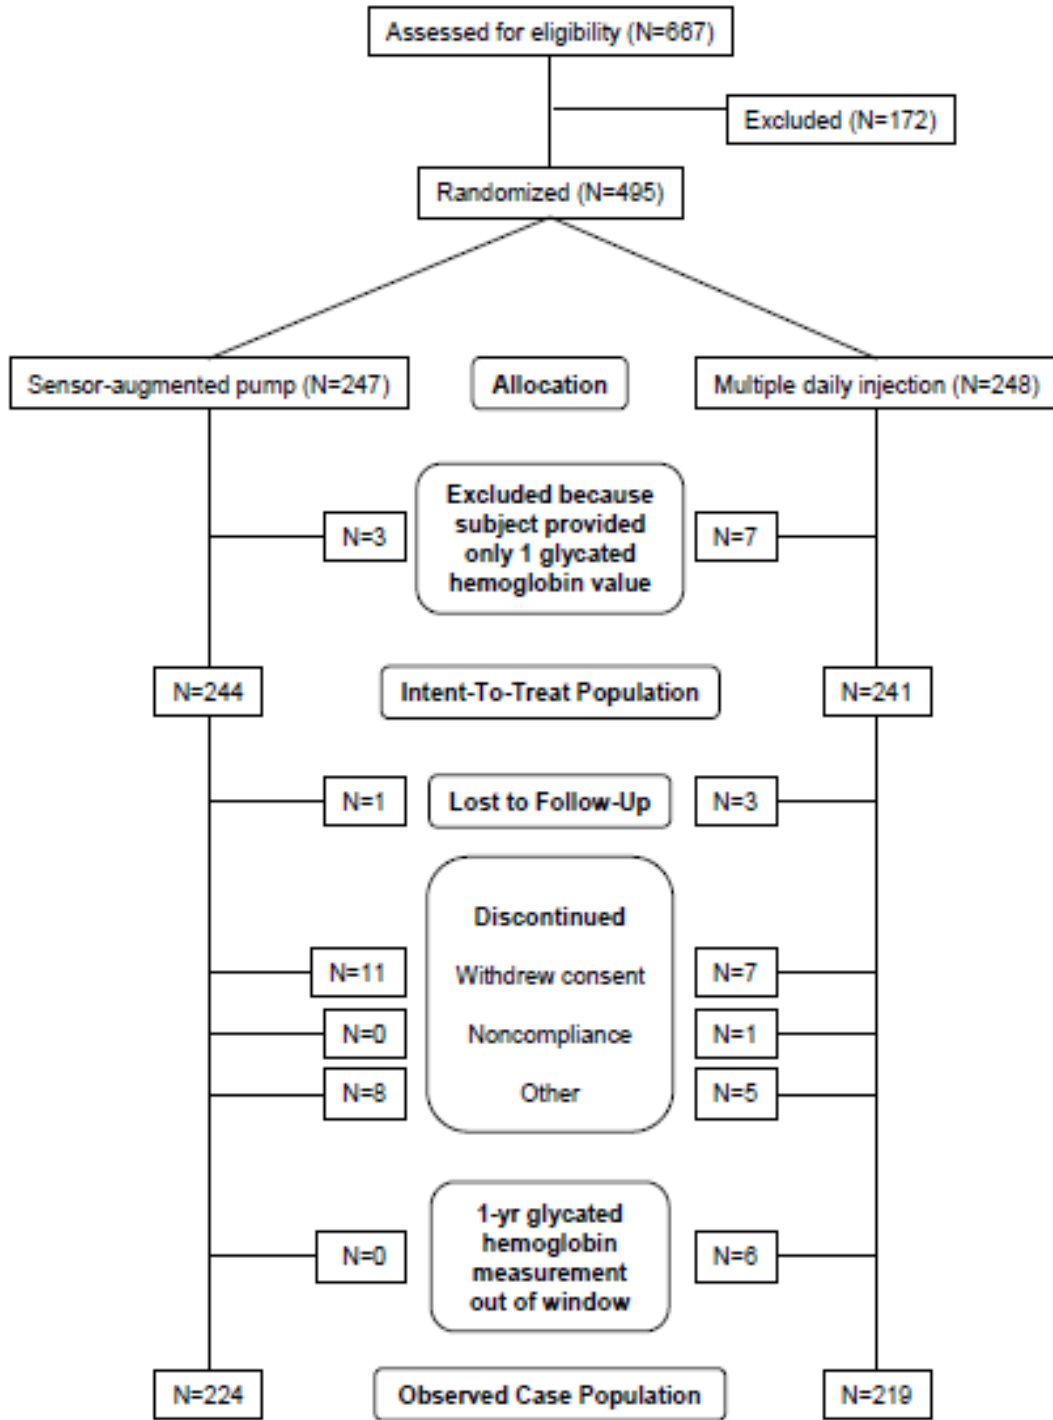

Supplement: nejmoa1002853_appendix.pdf [file nejmoa1002853_appendix.pdf]
